# Supplementary material for: Feasibility study of UV intensity monitoring in water disinfection systems using reverse-biased LED photometers
Source: Royal Society of Chemistry journal article supplement (doi:10.1039/d3ya00554b), 2024-01-01

**Feasibility Study of UV Intensity Monitoring in Water Disinfection Systems using Reverse-Biased LED Photometers**

**D. Pousty<sup>a\*1</sup>, Y. Gerchman<sup>a1</sup> & H. Mamane<sup>a</sup>**

*<sup>a</sup> School of Mechanical Engineering, Faculty of Engineering, Tel Aviv University, Tel Aviv 69978, Israel*

\*Corresponding author

<sup>1</sup>These authors contribute equally to this work

E-mail addresses:

[danapousty@mail.tau.ac.il](mailto:danapousty@mail.tau.ac.il) (D. Pousty), [ygerchman@gmail.com](mailto:ygerchman@gmail.com) (Y. Gerchman),

[hadasmg@tauex.tau.ac.il](mailto:hadasmg@tauex.tau.ac.il) (H. Mamane)

**Figure S1.** UV lamp monitoring alternatives tree diagram, where (A) and (B) can be used for external devices, (C), and (D) and (E) can be used for internal components.

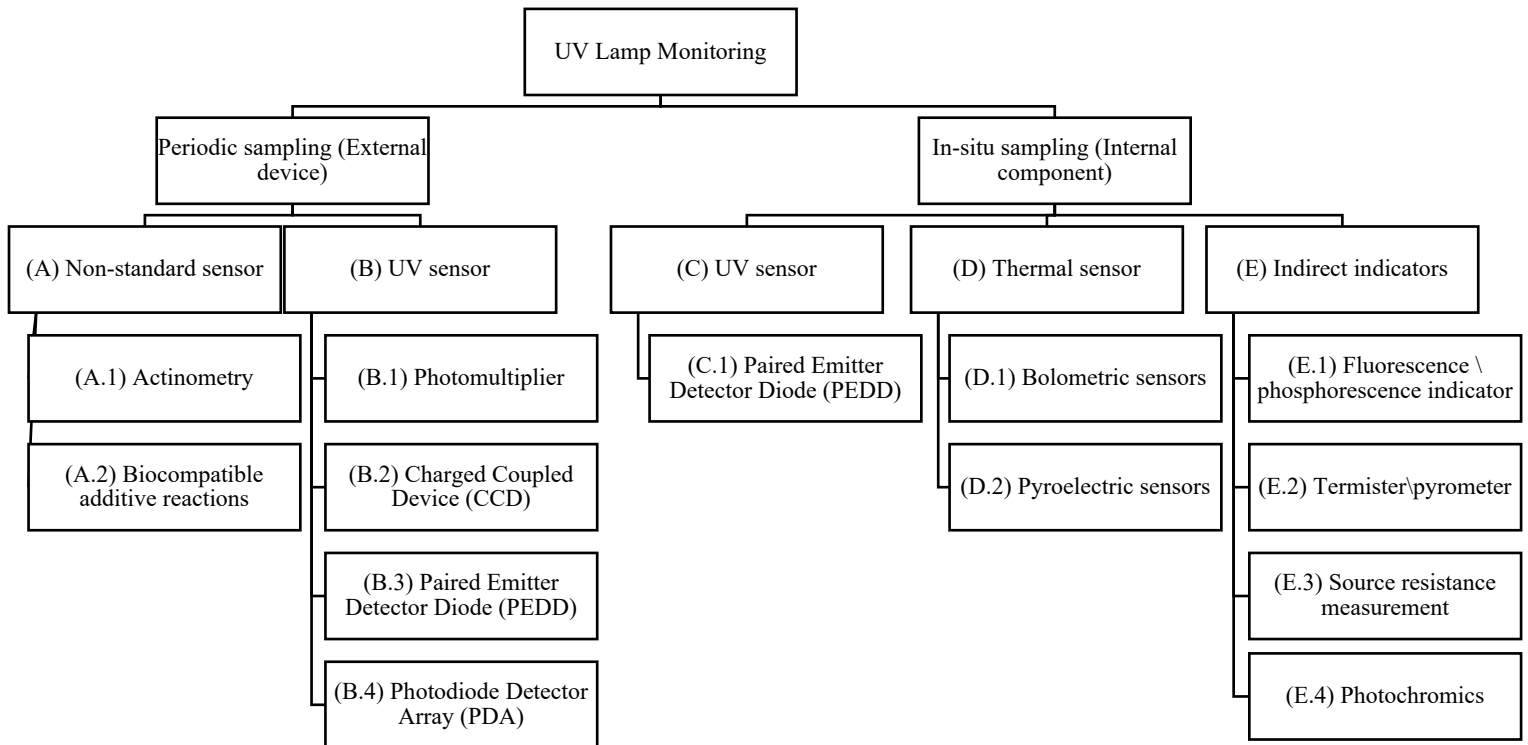

**Figure S2.** Violumas VC12X1C48LB-275 LED Strip Spectrum Measured by Ocean Optics USB4000 Spectroradiometer

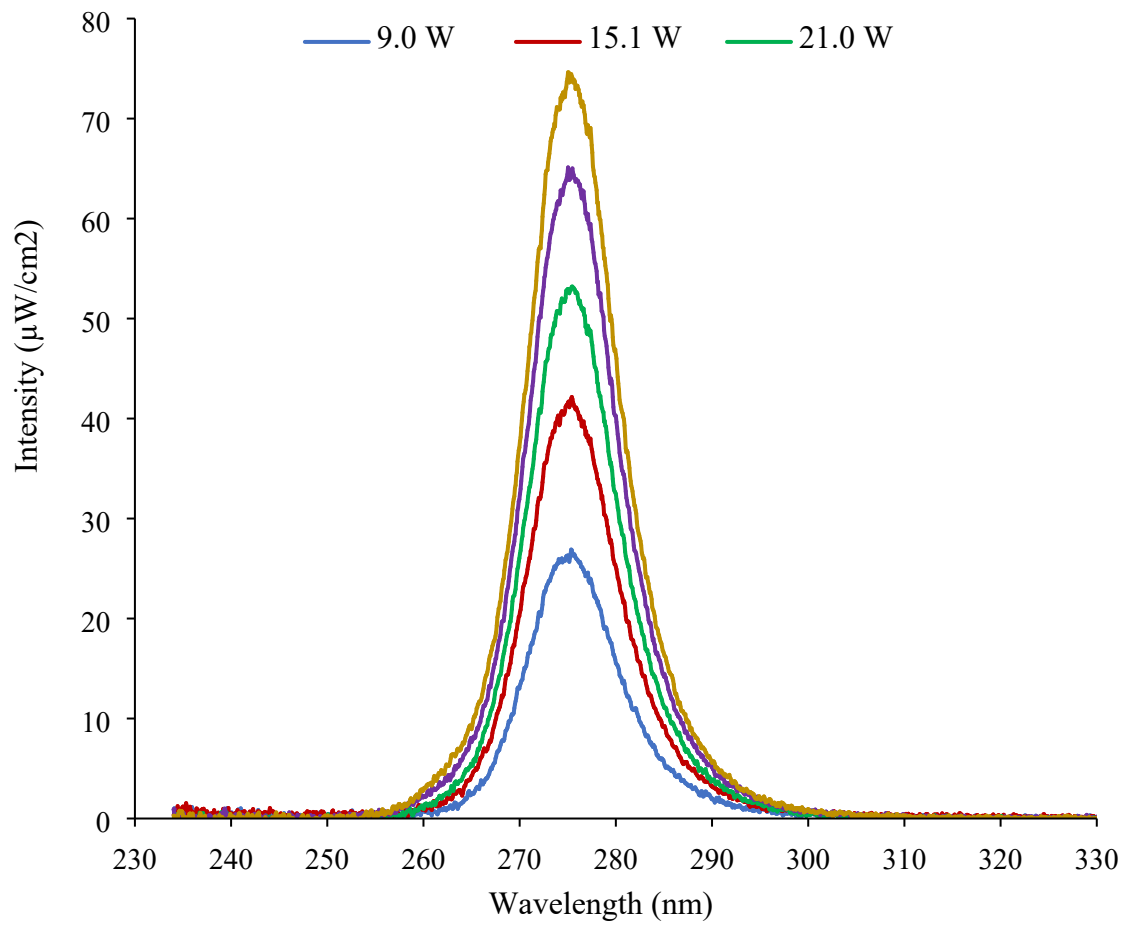

**Figure S3.** Neutral Density (FDU-0.4, OFR, NJ, USA) Transmittance Spectrum

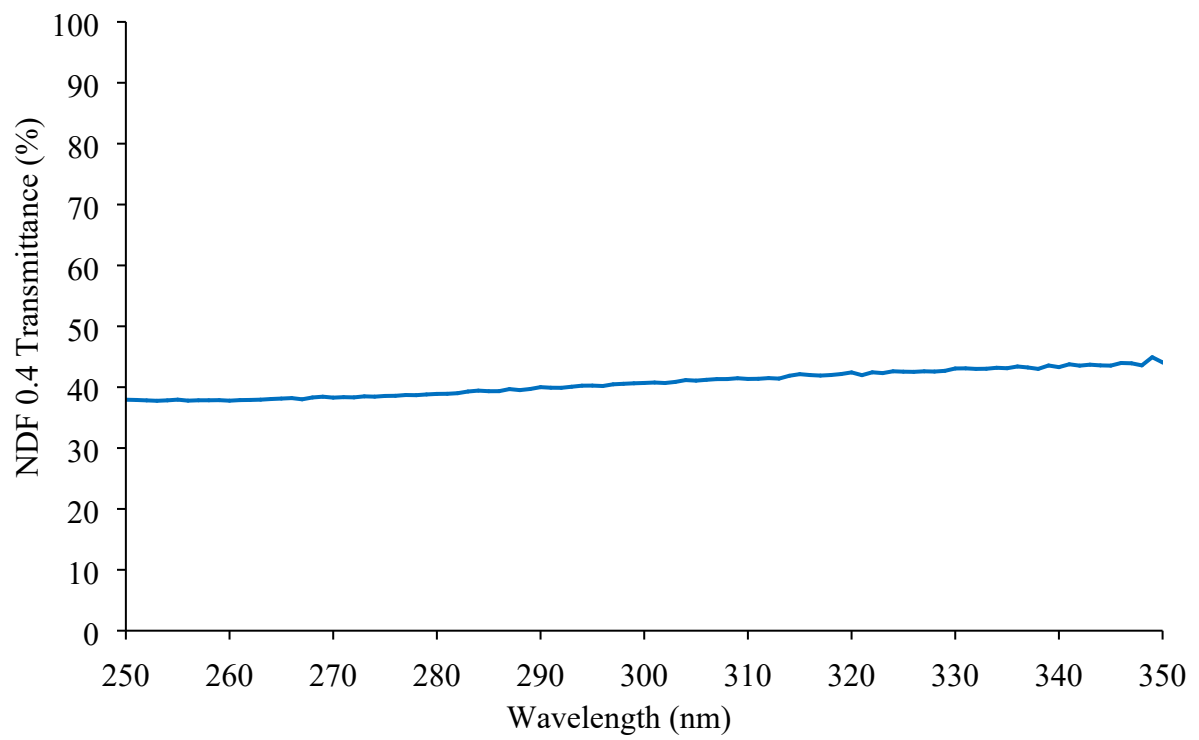

**Figure S4.** Photo of study set up

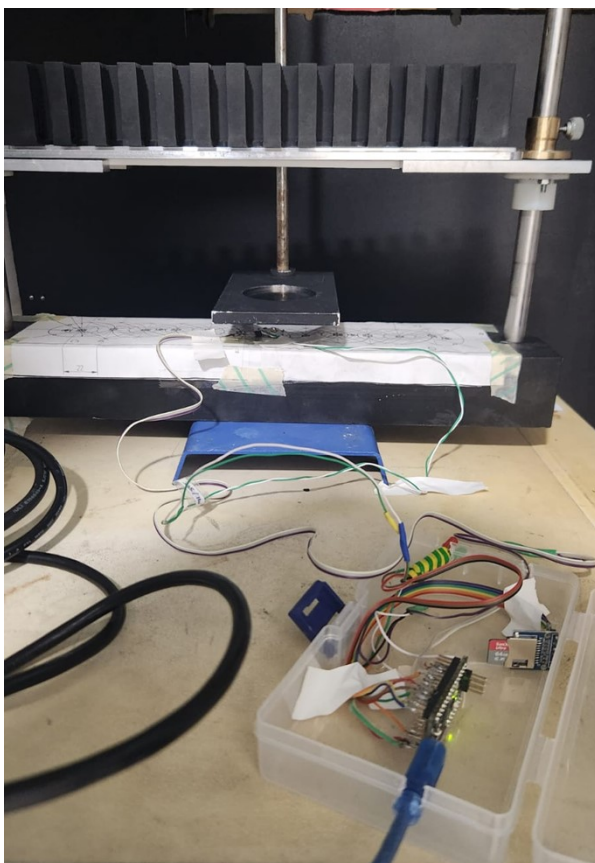

**Figure S5.** Electrical circuit diagram rLED configuration

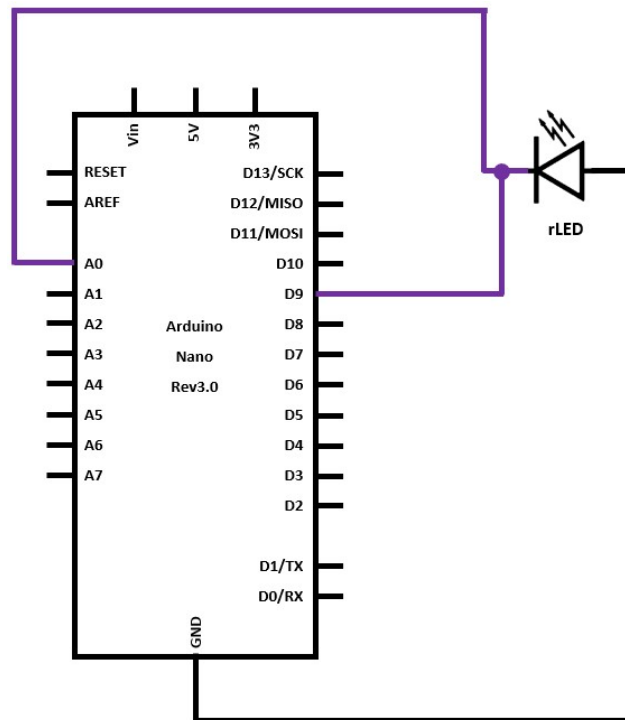

**Figure S6.** Electrical circuit diagram thermal influence configuration

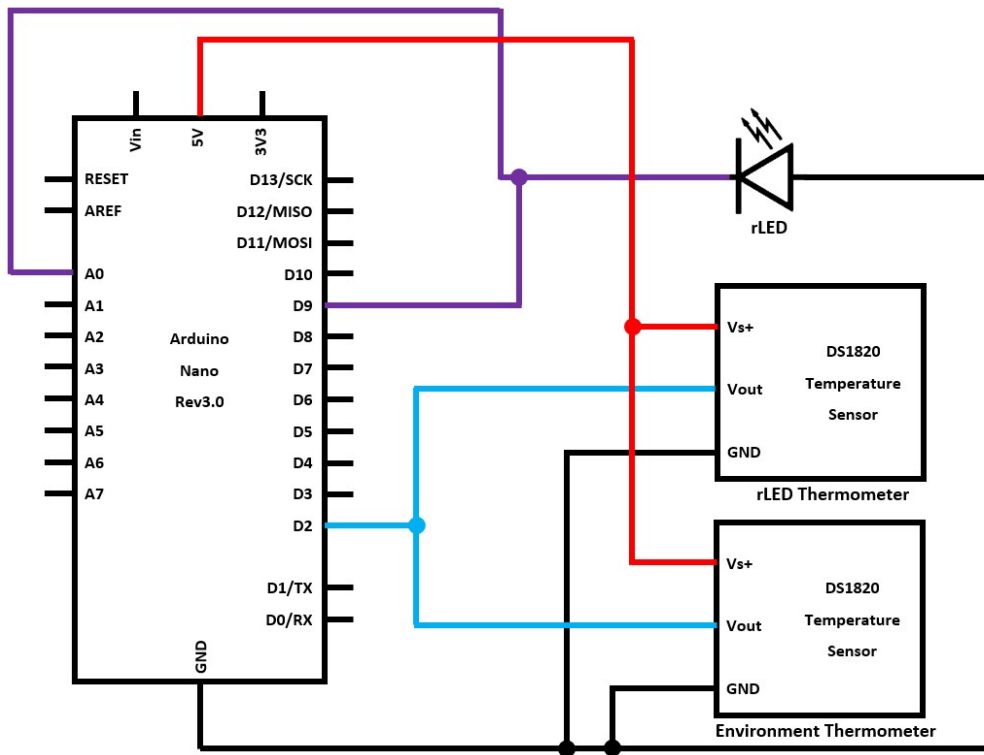

**Figure S7.** Correlation between source power and rLED output, each fig represents different rLED as following (A)L1 (B)L2 (C)L3 (D)L4 (E)L5 (F)L6 (G)L7 (H)L8 (I)L9 (J)L10

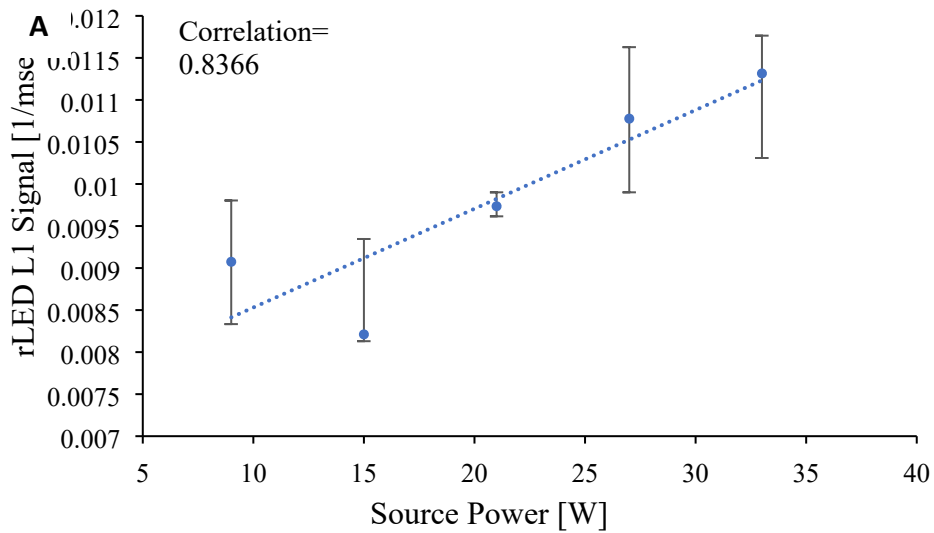

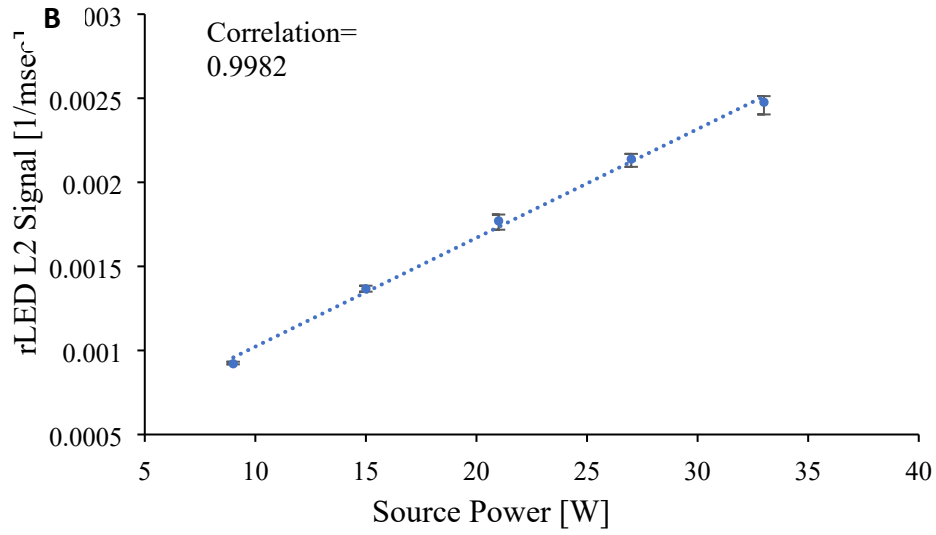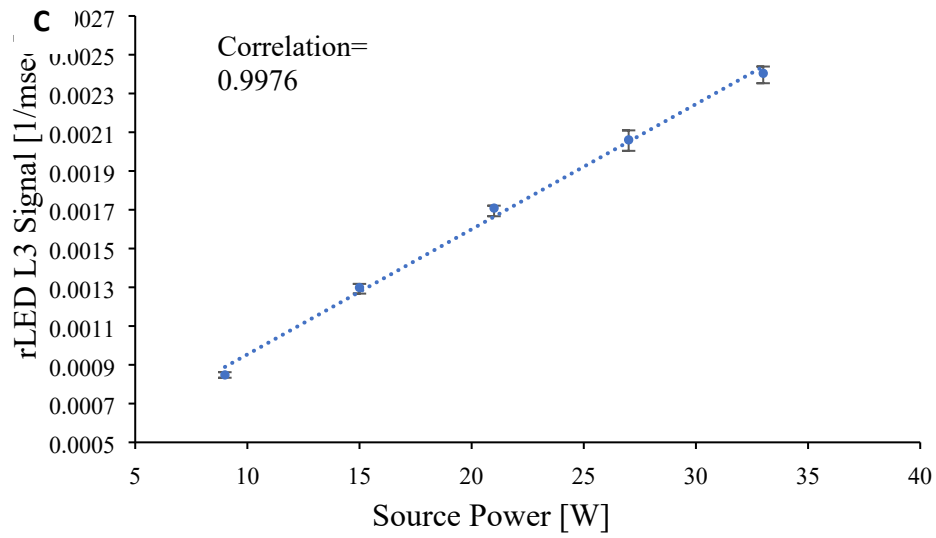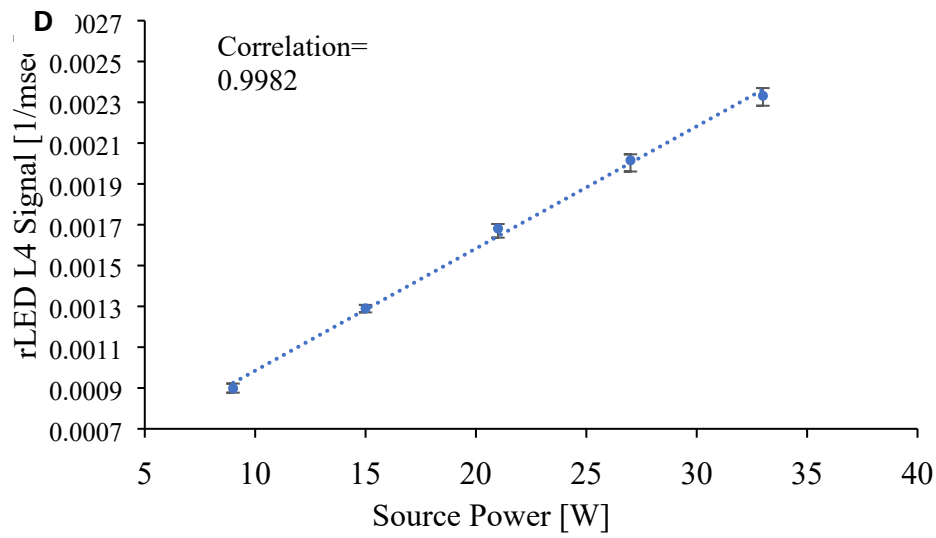

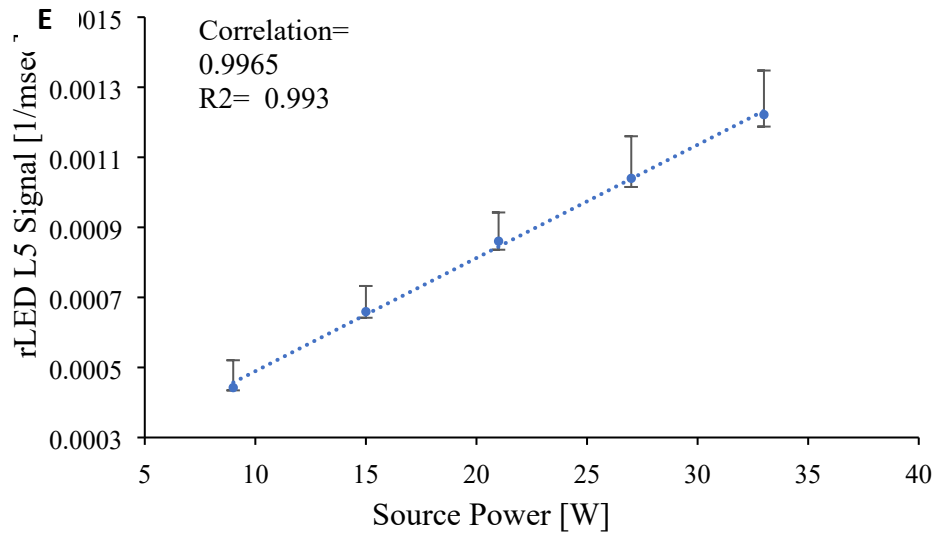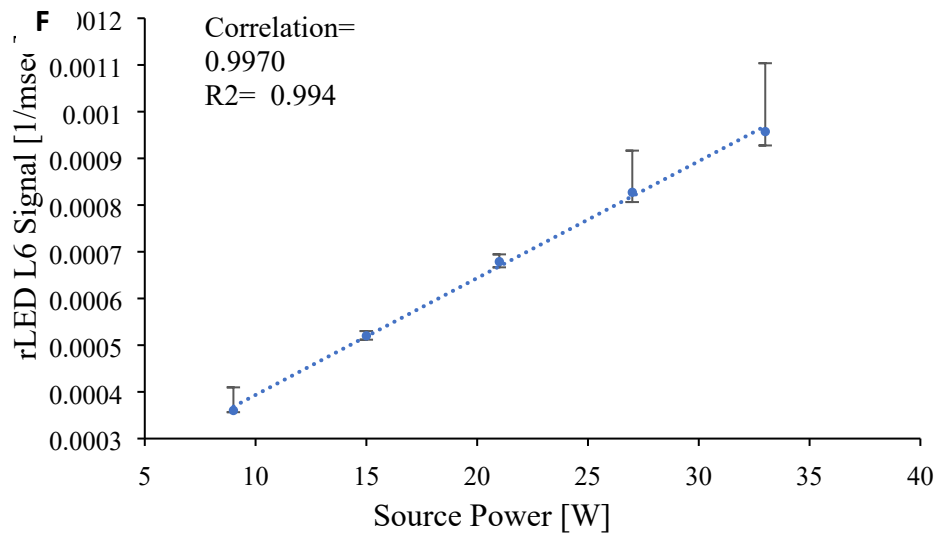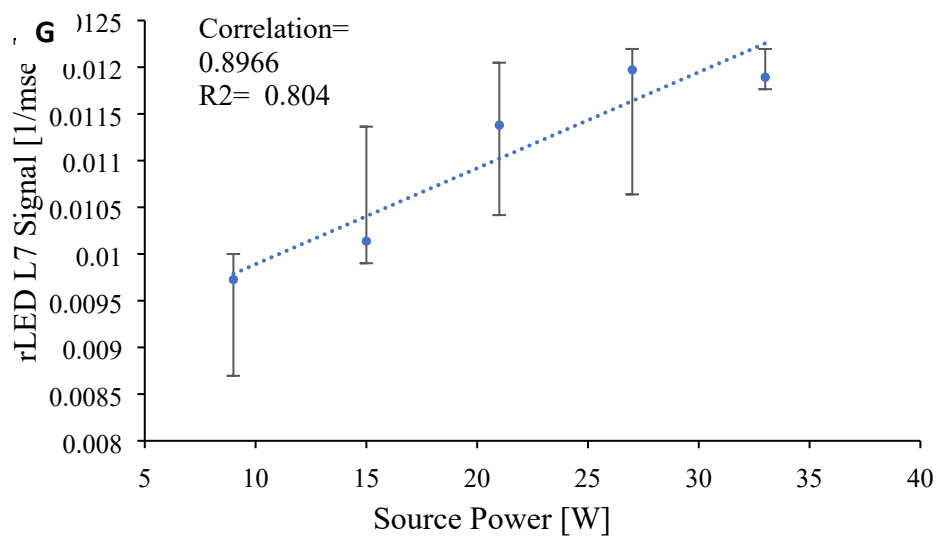



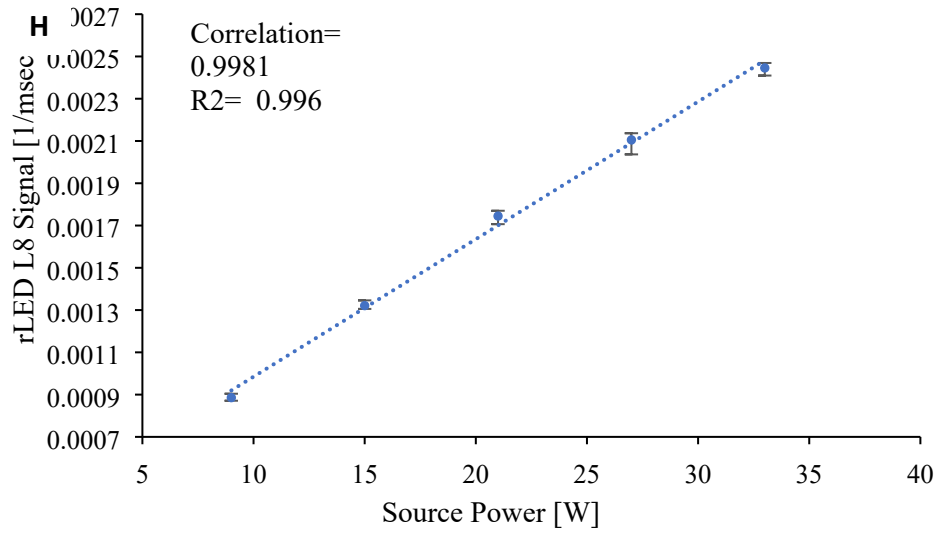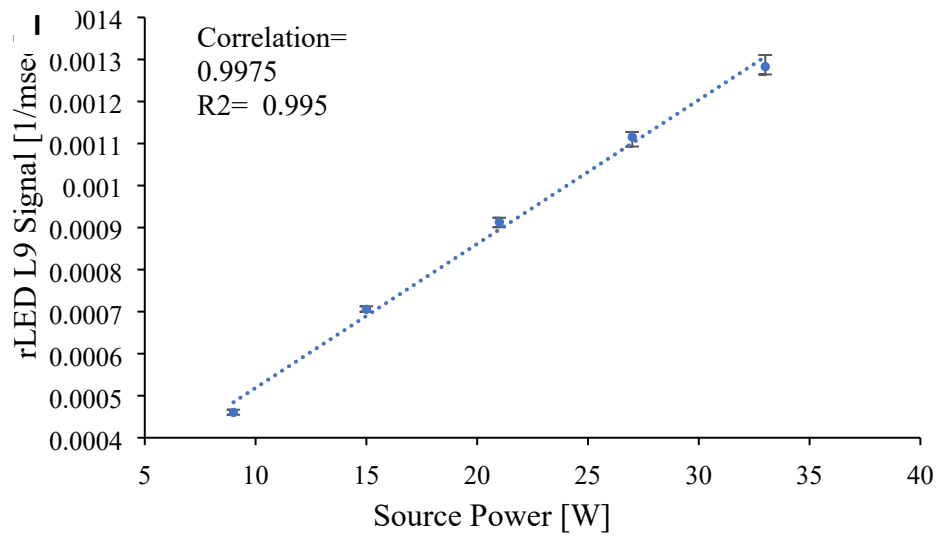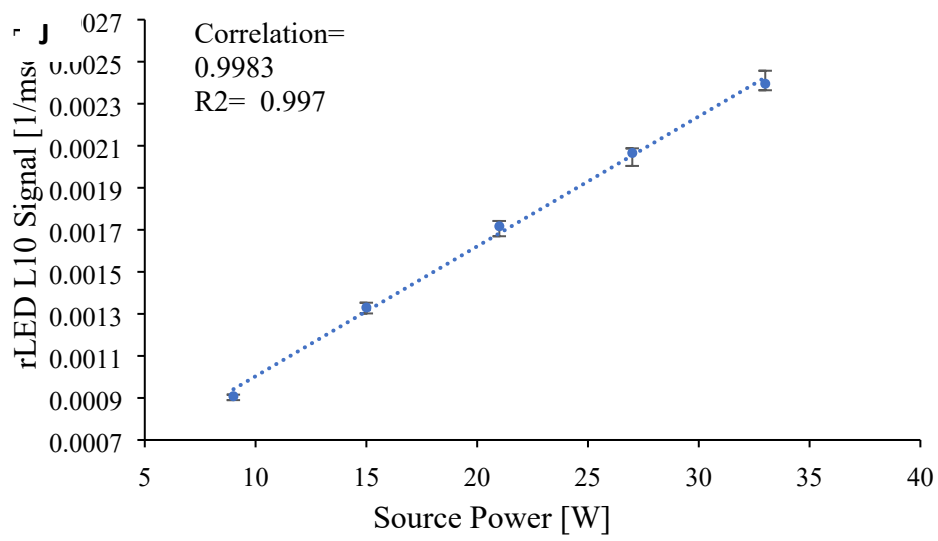

**Table S4. rLED spectroradiometer measurements and the normalized values**

| Sensor ID         | Source Power [W] | Mean      | Range     | Maximum  | Measurements Normalized by maximum |
|-------------------|------------------|-----------|-----------|----------|------------------------------------|
| OceanOpticsSensor | 9                | 3.39E+02  | 0.000E+00 | 3.39E+02 | 3.47E-01                           |
|                   | 15               | 5.38E+02  | 0.000E+00 | 5.38E+02 | 5.50E-01                           |
|                   | 21               | 6.79E+02  | 0.000E+00 | 6.79E+02 | 6.94E-01                           |
|                   | 27               | 8.460E+02 | 0.000E+00 | 8.46E+02 | 8.64E-01                           |
|                   | 33               | 9.79E+02  | 0.000E+00 | 9.79E+02 | 1.00E+00                           |
| L1                | 9                | 9.07E-03  | 1.47E-03  | 9.80E-03 | 7.71E-01                           |
|                   | 15               | 8.21E-03  | 1.22E-03  | 9.35E-03 | 6.98E-01                           |
|                   | 21               | 9.73E-03  | 2.86E-04  | 9.91E-03 | 8.25E-01                           |
|                   | 27               | 1.08E-02  | 1.73E-03  | 1.16E-02 | 9.16E-01                           |
|                   | 33               | 1.13E-02  | 1.45E-03  | 1.18E-02 | 9.62E-01                           |
| L2                | 9                | 9.21E-04  | 1.54E-05  | 9.33E-04 | 3.66E-01                           |
|                   | 15               | 1.37E-03  | 3.55E-05  | 1.38E-03 | 5.44E-01                           |
|                   | 21               | 1.77E-03  | 9.01E-05  | 1.81E-03 | 7.05E-01                           |
|                   | 27               | 2.14E-03  | 7.71E-05  | 2.17E-03 | 8.51E-01                           |
|                   | 33               | 2.47E-03  | 1.09E-04  | 2.51E-03 | 9.85E-01                           |
| L3                | 9                | 8.48E-04  | 2.87E-05  | 8.62E-04 | 3.48E-01                           |
|                   | 15               | 1.30E-03  | 5.01E-05  | 1.32E-03 | 5.32E-01                           |
|                   | 21               | 1.71E-03  | 5.45E-05  | 1.72E-03 | 7.01E-01                           |
|                   | 27               | 2.06E-03  | 1.06E-04  | 2.11E-03 | 8.45E-01                           |
|                   | 33               | 2.40E-03  | 8.61E-05  | 2.44E-03 | 9.86E-01                           |
| L4                | 9                | 8.98E-04  | 4.45E-05  | 9.22E-04 | 3.79E-01                           |
|                   | 15               | 1.29E-03  | 3.65E-05  | 1.31E-03 | 5.44E-01                           |
|                   | 21               | 1.68E-03  | 6.69E-05  | 1.70E-03 | 7.09E-01                           |
|                   | 27               | 2.02E-03  | 8.42E-05  | 2.04E-03 | 8.51E-01                           |
|                   | 33               | 2.33E-03  | 8.66E-05  | 2.37E-03 | 9.84E-01                           |

|     |    |          |          |          |          |
|-----|----|----------|----------|----------|----------|
| L5  | 9  | 4.42E-04 | 8.60E-05 | 5.21E-04 | 3.28E-01 |
|     | 15 | 6.59E-04 | 9.07E-05 | 7.33E-04 | 4.89E-01 |
|     | 21 | 8.60E-04 | 1.06E-04 | 9.42E-04 | 6.38E-01 |
|     | 27 | 1.04E-03 | 1.45E-04 | 1.16E-03 | 7.72E-01 |
|     | 33 | 1.22E-03 | 1.60E-04 | 1.35E-03 | 9.07E-01 |
| L6  | 9  | 3.60E-04 | 5.32E-05 | 4.10E-04 | 3.26E-01 |
|     | 15 | 5.20E-04 | 1.84E-05 | 5.30E-04 | 4.71E-01 |
|     | 21 | 6.79E-04 | 2.78E-05 | 6.94E-04 | 6.15E-01 |
|     | 27 | 8.27E-04 | 1.10E-04 | 9.17E-04 | 7.49E-01 |
|     | 33 | 9.57E-04 | 1.76E-04 | 1.10E-03 | 8.67E-01 |
| L7  | 9  | 9.77E-03 | 1.30E-03 | 1.00E-02 | 7.97E-01 |
|     | 15 | 1.01E-02 | 1.46E-03 | 1.14E-02 | 8.31E-01 |
|     | 21 | 1.14E-02 | 1.63E-03 | 1.20E-02 | 9.33E-01 |
|     | 27 | 1.20E-02 | 1.56E-03 | 1.22E-02 | 9.82E-01 |
|     | 33 | 1.19E-02 | 4.30E-04 | 1.22E-02 | 9.75E-01 |
| L8  | 9  | 8.86E-04 | 3.31E-05 | 9.04E-04 | 3.59E-01 |
|     | 15 | 1.32E-03 | 4.04E-05 | 1.35E-03 | 5.35E-01 |
|     | 21 | 1.74E-03 | 6.34E-05 | 1.77E-03 | 7.07E-01 |
|     | 27 | 2.10E-03 | 1.00E-04 | 2.14E-03 | 8.53E-01 |
|     | 33 | 2.45E-03 | 5.95E-05 | 2.47E-03 | 9.90E-01 |
| L9  | 9  | 4.60E-04 | 1.19E-05 | 4.66E-04 | 3.51E-01 |
|     | 15 | 7.05E-04 | 1.30E-05 | 7.13E-04 | 5.38E-01 |
|     | 21 | 9.13E-04 | 2.25E-05 | 9.23E-04 | 6.97E-01 |
|     | 27 | 1.12E-03 | 3.45E-05 | 1.13E-03 | 8.51E-01 |
|     | 33 | 1.28E-03 | 4.64E-05 | 1.31E-03 | 9.79E-01 |
| L10 | 9  | 9.08E-04 | 2.61E-05 | 9.16E-04 | 3.70E-01 |
|     | 15 | 1.33E-03 | 5.11E-05 | 1.35E-03 | 5.41E-01 |

|  |    |          |          |          |          |
|--|----|----------|----------|----------|----------|
|  | 21 | 1.72E-03 | 7.27E-05 | 1.74E-03 | 6.99E-01 |
|  | 27 | 2.07E-03 | 8.37E-05 | 2.09E-03 | 8.41E-01 |
|  | 33 | 2.39E-03 | 9.29E-05 | 2.46E-03 | 9.75E-01 |

**Figure S8.** 365nm/3W rLED normalized light intensity measurements during long term exposure.

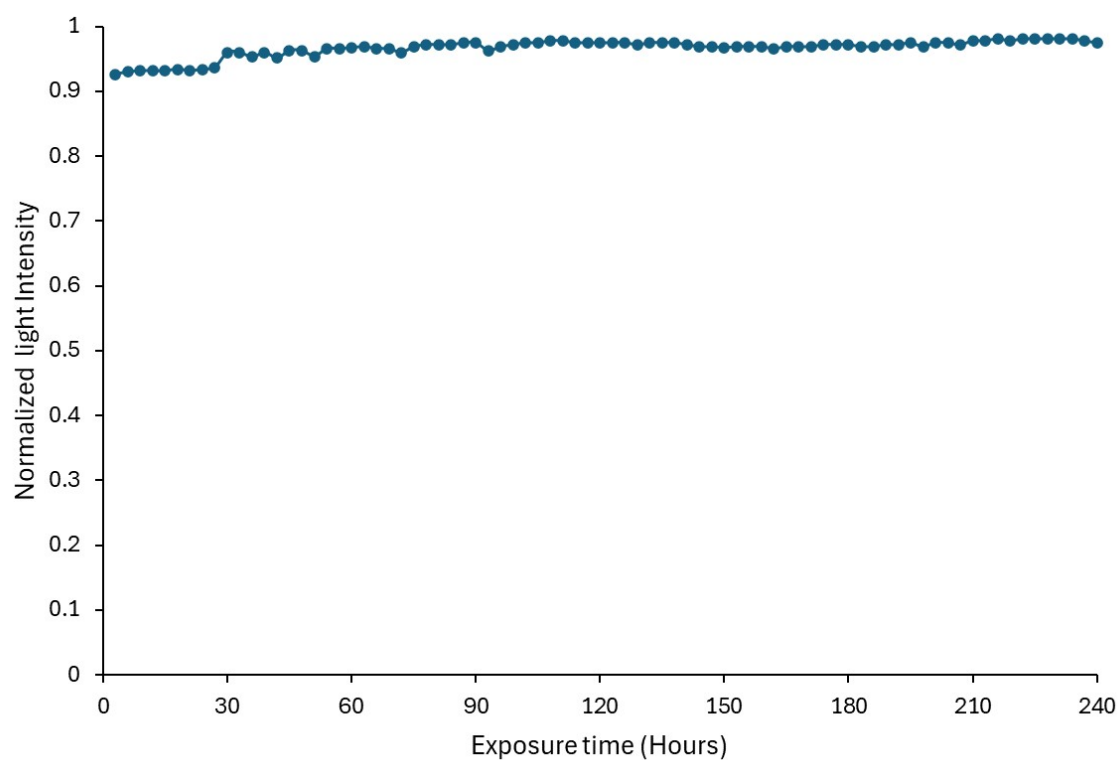

Supplement: d3ya00554b1.pdf [file d3ya00554b1.pdf]
